# Supplementary material for: Gab2 promotes the growth of colorectal cancer by regulating the M2 polarization of tumor-associated macrophages
Source: PubMed Central journal article supplement — Int J Mol Med. 2023 Nov 8;53(1):3. doi: 10.3892/ijmm.2023.5327 (PMC10688767; doi:10.3892/ijmm.2023.5327), 2023-11-08
Supplement: supplementary_data.pdf [file supplementary_data.pdf]

Table SI. Sequences of shRNA for lentivirus infection.

| Group       | Sequences of shRNA (5'-3') |
|-------------|----------------------------|
| CON077      | TTCTCCGAACGTGTCACGT        |
| LV-Gab2-sh1 | CCTGAGAAACAACACTGTCAT      |
| LV-Gab2-sh2 | TGGACAATATGGATGTCCCAA      |
| LV-Gab2-sh3 | CCGACACAATACAGAATTCAA      |

CON077, The negative control viral vector; LV-Gab2-shRNA, Lentiviral vector encoding Gab2 small hairpin RNA.

Table SII. Sequences of forward and reverse primers used in quantitative PCR.

| Species             | Gene symbol           |                | Primer sequence (5'-3')  |
|---------------------|-----------------------|----------------|--------------------------|
| <i>Mus musculus</i> | <i>Gab2</i>           | Forward primer | AATCGCCTCCCGAGAAGAAGT    |
|                     |                       | Reverse primer | ACAAGTTCAGGTTGATGATCCG   |
| <i>Mus musculus</i> | <i>Gapdh</i>          | Forward primer | AGGTCGGTGTGAACGGATTTG    |
|                     |                       | Reverse primer | TGTAGACCATGTAGTTGAGGTCA  |
| <i>Mus musculus</i> | <i>Il-10</i>          | Forward primer | CTGCTATGCTGCCTGCTCTTACTG |
|                     |                       | Reverse primer | ATGTGGCTCTGGCCGACTGG     |
| <i>Mus musculus</i> | <i>Arg-1</i>          | Forward primer | TGCTCACACTGACATCAACTCC   |
|                     |                       | Reverse primer | TCTACGTCTCGCAAGCCAATGTAC |
| <i>Mus musculus</i> | <i>Ym-1 (Chil3)</i>   | Forward primer | GAATGAAGGAGCCACTGAGGTCTG |
|                     |                       | Reverse primer | TTGTTGTCCTTGAGCCACTGAGC  |
| <i>Mus musculus</i> | <i>Fizz1 (Retnla)</i> | Forward primer | GCTGATGGTCCCAGTGAATAC    |
|                     |                       | Reverse primer | CCAGTAGCAGTCATCCCAGC     |
| <i>Mus musculus</i> | <i>Inos (Nos2)</i>    | Forward primer | TGCCACGGACGAGACGGATAG    |
|                     |                       | Reverse primer | CTCTTCAAGCACCTCCAGGAACG  |
| <i>Mus musculus</i> | <i>Il-12</i>          | Forward primer | GTCCCTCAGAAGCTAACCATCTCC |
|                     |                       | Reverse primer | CCAGAGCCTATGACTCCATGTC   |
| <i>Mus musculus</i> | <i>Ccl17</i>          | Forward primer | TACCATGAGGTCACCTCAGATGC  |
|                     |                       | Reverse primer | GCACTCTCGGCCTACATTGG     |
| <i>Mus musculus</i> | <i>Vegf</i>           | Forward primer | GCACATAGAGAGAATGAGCTTCC  |
|                     |                       | Reverse primer | CTCCGCTCTGAACAAGGCT      |
| <i>Mus musculus</i> | <i>Cxcl9</i>          | Forward primer | GGAGTTCGAGGAACCCTAGTG    |
|                     |                       | Reverse primer | GGGATTTGTAGTGGATCGTGC    |

*Gab2*, Grb2-associated binder 2; *Il-10*, Interleukin 10; *Arg-1*, arginase-1; *Ym-1*, Chil3/chitinase-like protein 3; *Fizz1*, Retnla/resistin-like molecule alpha; *Inos* Inducible nitric oxide synthase; *Il-12*, Interleukin 12; *Ccl17*, C-C motif chemokine ligand 17; *Vegf*, Vascular endothelial growth factor; *Cxcl9*, C-X-C motif chemokine ligand 9.
